# Supplementary material for: Unbalance between Pyridine Nucleotide Cofactors in The SOD1 Deficient Yeast Saccharomyces cerevisiae Causes Hypersensitivity to Alcohols and Aldehydes
Source: MDPI journal article supplement (doi:10.3390/ijms24010659), 2022-12-30
Supplement: s1 [file s1]

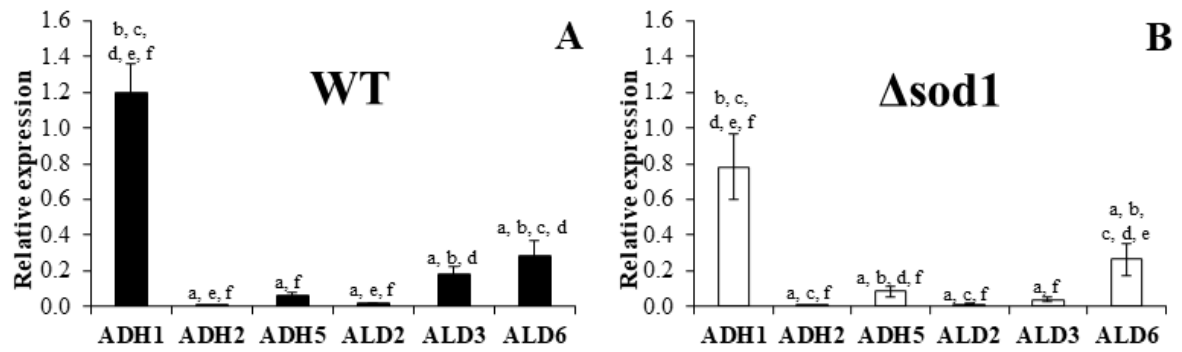

**Figure S1.** *ADH* and *ALD* genes expression in the wild-type (WT) strain (A) and  $\Delta$ *sod1* mutant (B). *ADH* and *ALD* genes expression were performed by qPCR assay with TaqMan probes. The relative gene expression was calculated with a comparative  $C_T$  method:  $-\Delta C_T$  for multiple gene expression in the same strain. The results are presented as mean  $\pm$  SD from three independent experiments; a, with respect to *ADH1*; b, with respect to *ADH2*; c, with respect to *ADH5*; d, with respect to *ALD2*; e, with respect to *ALD3*; f, with respect to *ALD6*.
